# Supplementary material for: 3′-5′ Phosphoadenosine phosphate is an inhibitor of PARP-1 and a potential mediator of the lithium-dependent inhibition of PARP-1 in vivo
Source: PubMed Central journal article supplement — Biochem J. 2012 Mar 27;443(Pt 2):485–90. doi: 10.1042/BJ20111057 (PMC3316155; doi:10.1042/bj20111057), 2012-03-27
Supplement: bj4430485add.pdf [file bj4430485add.pdf]

## SUPPLEMENTARY ONLINE DATA

# 3'-5' Phosphoadenosine phosphate is an inhibitor of PARP-1 and a potential mediator of the lithium-dependent inhibition of PARP-1 *in vivo*

Elie TOLEDANO\*<sup>1</sup>, Vasily OGRYZKO†, Antoine DANCHIN‡, Daniel LADANT\* and Undine MECHOLD\*<sup>1</sup>

\*Institut Pasteur, CNRS UMR 3528, Unité de Biochimie des Interactions macromoléculaires, Département de Biologie Structurale et Chimie, 25–28 rue du Docteur Roux, 75724 Paris cedex 15, France, †Institut Gustave Roussy, UMR 8126, Unité d'Interactions Moléculaires et Cancer, 94805 Villejuif, France, and ‡AMAbiotics SAS, 5 rue Henri Desbrères, 91030 Evry Cedex, France

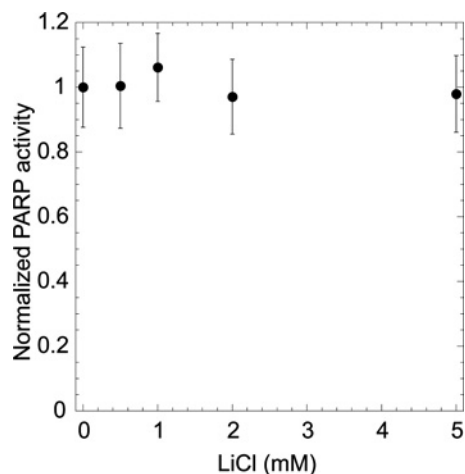

**Figure S1** Lithium effect on PARP-1 activity *in vitro*

PARP-1 activity was measured using the HT Universal Colorimetric PARP assay kit as described in the Materials and methods section of the main text in the presence of the concentrations of lithium indicated. The PARP-1 activity (arbitrary unit) is expressed as a percentage of the activity measured in the absence of lithium.

Received 15 June 2011/19 December 2011; accepted 12 January 2012  
Published as BJ Immediate Publication 12 January 2012, doi:10.1042/BJ20111057

<sup>1</sup> Correspondence may be addressed to either of these authors (email [elie.toledano@pasteur.fr](mailto:elie.toledano@pasteur.fr) or [undine.mechold@pasteur.fr](mailto:undine.mechold@pasteur.fr)).
